# Supplementary material
Source: PubMed Central journal article supplement (PMC7612230)

**A**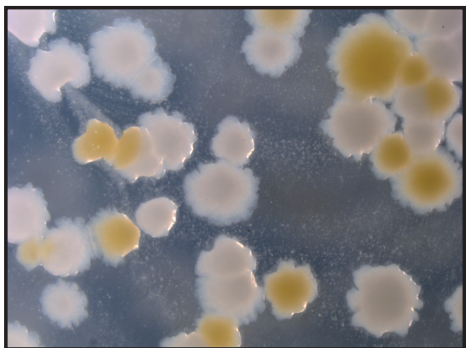**B**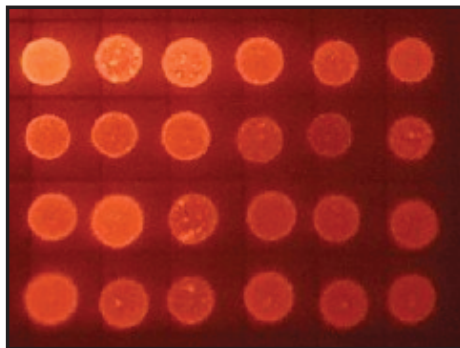**C**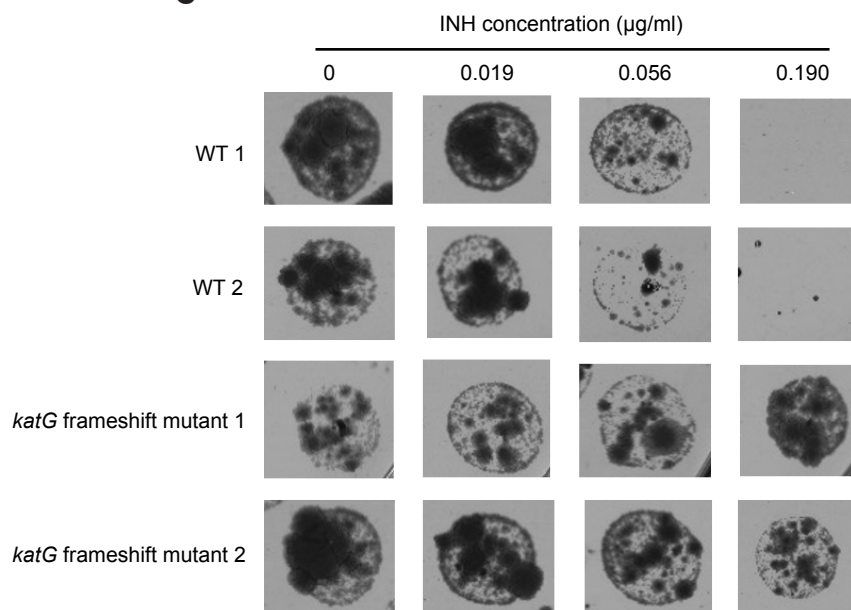

Supplement: EMS140718-supplement-Supplementary_Figure_1.pdf [file EMS140718-supplement-Supplementary_Figure_1.pdf]
